# Supplementary material
Source: HighWire-hosted journal article supplement (http://dmd.aspetjournals.org/highwire/filestream/80888/field_highwire_adjunct_files/1/1287_supp_table2.xlsx)
Supplement: 1287_supp_table2.xlsx [file 1287_supp_table2.xlsx]

## Sheet: Sheet1
Supplemental Data for Manuscript #: DMD-AR-2023-001287 Authors: Reed J.R., Guidry, J.J., and Backes, W.L., 2023 Title: The Influence of Lipid Microdomain Heterogeneity on Protein-Protein Interactions: Proteomic Analysis of Co-Immunoprecipitated Binding Partners of P450 1A2 and P450 3A in Rat Liver Microsomes
Accession	Description	Abundance Ratio: Ordered/disordered in control microsomes	Abundance Ratio P-Value:	Gene Symbol	Coverage [%]	# Peptides	# PSMs	# Unique Peptides	Score Sequest HT: Sequest HT	# Protein Groups	KEGG Pathways	Reactome Pathways
Q5M875	17-beta-hydroxysteroid dehydrogenase 13 [OS=Rattus norvegicus]	0.147	1e-15	Hsd17b13	4	1	2	1	4.56	1		Lipid particle organization
Q9JJ46	3-beta-hydroxysteroid-delta(8),delta(7)-isomerase [OS=Rattus norvegicus]	81.913	1.53283e-11	Ebp	9	3	4	3	9.87	1	Metabolic pathways; Steroid biosynthesis	Cholesterol biosynthesis via lathosterol; Cholesterol biosynthesis via desmosterol
P17074	40S ribosomal protein S19 [OS=Rattus norvegicus]	2.936	8.45087e-06	Rps19; LOC100910336	4	1	2	1	4.75	1	Ribosome
P62909	40S ribosomal protein S3 [OS=Rattus norvegicus] ?			Rps3	9	1	2	1	5.81	1
P62755	40S RIBOSOMAL PROTEIN S6 [OS=Rattus norvegicus] ?			LOC100911372; Rps6	5	1	1	1	3.48	1
P38983	40S ribosomal protein SA [OS=Rattus norvegicus]	0.155	1e-15	Rpsa	5	1	1	1	2.04	1	Ribosome	SRP-dependent cotranslational protein targeting to membrane; Formation of a pool of free 40S subunits; Translation initiation complex formation; Major pathway of rRNA processing in the nucleolus and cytosol; GTP hydrolysis and joining of the 60S ribosomal subunit; Formation of the ternary complex, and subsequently, the 43S complex; Ribosomal scanning and start codon recognition; Nonsense Mediated…
P19945	60S acidic ribosomal protein P0 [OS=Rattus norvegicus]	31.764	1e-15	Rplp0	4	1	2	1	5.18	1	Ribosome	SRP-dependent cotranslational protein targeting to membrane; Formation of a pool of free 40S subunits; Major pathway of rRNA processing in the nucleolus and cytosol; GTP hydrolysis and joining of the 60S ribosomal subunit; Nonsense Mediated Decay (NMD) enhanced by the Exon Junction Complex (EJC); Nonsense Mediated Decay (NMD) independent of the Exon Junction Complex (EJC); L13a-mediated translati…
P02401	60S acidic ribosomal protein P2 [OS=Rattus norvegicus]	17.706	1e-15	Rplp2; LOC100911575	10	1	1	1	4.39	1	Ribosome	SRP-dependent cotranslational protein targeting to membrane; Formation of a pool of free 40S subunits; Major pathway of rRNA processing in the nucleolus and cytosol; GTP hydrolysis and joining of the 60S ribosomal subunit; Nonsense Mediated Decay (NMD) enhanced by the Exon Junction Complex (EJC); Nonsense Mediated Decay (NMD) independent of the Exon Junction Complex (EJC); L13a-mediated translati…
Q63507	60S ribosomal protein L14 [OS=Rattus norvegicus]	62.539	1e-15	Rpl14	39	2	2	2	7.75	1
P61314	60S ribosomal protein L15 [OS=Rattus norvegicus]	32.07	1e-15	Rpl15	7	1	1	1	2.43	1	Ribosome	SRP-dependent cotranslational protein targeting to membrane; Formation of a pool of free 40S subunits; Major pathway of rRNA processing in the nucleolus and cytosol; GTP hydrolysis and joining of the 60S ribosomal subunit; Nonsense Mediated Decay (NMD) enhanced by the Exon Junction Complex (EJC); Nonsense Mediated Decay (NMD) independent of the Exon Junction Complex (EJC); L13a-mediated translati…
P24049	60S ribosomal protein L17 [OS=Rattus norvegicus]	100	1e-15	Rpl17	8	1	1	1	2.81	1	Ribosome
P47198	60S ribosomal protein L22 [OS=Rattus norvegicus]	3.831	5.61185e-06	LOC100360057; Rpl22	9	1	2	1	4.66	1	Ribosome
P62832	60S ribosomal protein L23 [OS=Rattus norvegicus]	35.613	1e-15	Rpl23	11	1	2	1	5.82	1	Ribosome	SRP-dependent cotranslational protein targeting to membrane; Formation of a pool of free 40S subunits; Major pathway of rRNA processing in the nucleolus and cytosol; GTP hydrolysis and joining of the 60S ribosomal subunit; Nonsense Mediated Decay (NMD) enhanced by the Exon Junction Complex (EJC); Nonsense Mediated Decay (NMD) independent of the Exon Junction Complex (EJC); L13a-mediated translati…
P62752	60S ribosomal protein L23a [OS=Rattus norvegicus]	14.219	1e-15	Rpl23a	8	1	2	1	4.93	1	Ribosome	SRP-dependent cotranslational protein targeting to membrane; Formation of a pool of free 40S subunits; Major pathway of rRNA processing in the nucleolus and cytosol; GTP hydrolysis and joining of the 60S ribosomal subunit; Nonsense Mediated Decay (NMD) enhanced by the Exon Junction Complex (EJC); Nonsense Mediated Decay (NMD) independent of the Exon Junction Complex (EJC); L13a-mediated translati…
P83732	60S ribosomal protein L24 [OS=Rattus norvegicus]	79.606	1e-15	Rpl24	8	1	2	1	6.52	1	Ribosome
P61354	60S ribosomal protein L27 [OS=Rattus norvegicus]	19.088	1e-15	Rpl27	7	1	2	1	4.61	1	Ribosome
P05426	60S ribosomal protein L7 [OS=Rattus norvegicus]	71.217	1e-15	Rpl7	4	1	2	1	5.66	1
P62919	60S ribosomal protein L8 [OS=Rattus norvegicus]	59.542	1e-15	Rpl8; LOC100910370; LOC100360117; LOC108348142	6	1	1	1	4.37	1	Ribosome	SRP-dependent cotranslational protein targeting to membrane; Formation of a pool of free 40S subunits; Major pathway of rRNA processing in the nucleolus and cytosol; GTP hydrolysis and joining of the 60S ribosomal subunit; Nonsense Mediated Decay (NMD) enhanced by the Exon Junction Complex (EJC); Nonsense Mediated Decay (NMD) independent of the Exon Junction Complex (EJC); L13a-mediated translati…
Q9Z2Z8	7-dehydrocholesterol reductase [OS=Rattus norvegicus]	3.023	0.0331027	Dhcr7	2	1	2	1	4.97	1	Metabolic pathways; Steroid biosynthesis	Cholesterol biosynthesis via lathosterol; Cholesterol biosynthesis via desmosterol
P60711	Actin, cytoplasmic 1 [OS=Rattus norvegicus]	2.005	0.0272266	Actb	5	1	1	1	3.59	1	Oxytocin signaling pathway; Tight junction; Apoptosis; Focal adhesion; Rap1 signaling pathway; Influenza A; Adherens junction; Regulation of actin cytoskeleton; Viral myocarditis; Bacterial invasion of epithelial cells; Platelet activation; Leukocyte transendothelial migration; Proteoglycans in cancer; Gastric acid secretion; Arrhythmogenic right ventricular cardiomyopathy (ARVC); Salmonella infe…	VEGFA-VEGFR2 Pathway; Adherens junctions interactions; Formation of annular gap junctions; Regulation of actin dynamics for phagocytic cup formation; RHO GTPases Activate Formins; Cell-extracellular matrix interactions; UCH proteinases; RHO GTPases Activate WASPs and WAVEs; Interaction between L1 and Ankyrins; Recycling pathway of L1; RHO GTPases activate IQGAPs; B-WICH complex positively regulat…
B3DMA2	acyl-CoA dehydrogenase family member 11 [OS=Rattus norvegicus]	0.411	0.000722866	Acad11	2	1	2	1	4.96	1		Mitochondrial Fatty Acid Beta-Oxidation
P07308	Acyl-CoA desaturase 1 [OS=Rattus norvegicus] ?			Scd1; Scd	5	1	1	1	2.58	1
A0JPQ8	alkylglycerol monooxygenase [OS=Rattus norvegicus]	34.739	1e-15	Agmo	3	1	2	1	6.36	1		Triglyceride biosynthesis
Q63041	Alpha-1-macroglobulin [OS=Rattus norvegicus]	0.433	2.00751e-08	Pzp	1	1	2	1	5.58	1
P00762	Anionic trypsin-1 [OS=Rattus norvegicus] ?			Prss1	8	1	5	1	13.94	1
Q7TMA5	apolipoprotein B-100 [OS=Rattus norvegicus]	0.211	1e-15	Apob	1	2	3	2	10.34	1	Fat digestion and absorption; Vitamin digestion and absorption	Signaling by GPCR; VLDL assembly; Chylomicron assembly; Regulation of Insulin-like Growth Factor (IGF) transport and uptake by Insulin-like Growth Factor Binding Proteins (IGFBPs); Scavenging by Class A Receptors; Scavenging by Class B Receptors; Platelet sensitization by LDL; Chylomicron remodeling; Post-translational protein phosphorylation; Chylomicron clearance; Retinoid metabolism and transp…
Q9ES38	Bile acyl-CoA synthetase [OS=Rattus norvegicus]	0.523	1e-15	Slc27a5	6	3	8	3	24.2	1	Metabolic pathways; Insulin resistance; Primary bile acid biosynthesis; PPAR signaling pathway; Bile secretion	Synthesis of bile acids and bile salts via 7alpha-hydroxycholesterol; Synthesis of bile acids and bile salts via 24-hydroxycholesterol; Recycling of bile acids and salts
P27653	C-1-tetrahydrofolate synthase, cytoplasmic [OS=Rattus norvegicus]	0.416	2.85948e-08	Mthfd1	3	2	3	2	7.46	1	One carbon pool by folate; Metabolic pathways
P04762	catalase [OS=Rattus norvegicus]	0.382	0.00208471	Cat	3	1	1	1	2.79	1	Longevity regulating pathway; Longevity regulating pathway - multiple species; Tryptophan metabolism; Amyotrophic lateral sclerosis (ALS); FoxO signaling pathway; Glyoxylate and dicarboxylate metabolism; Peroxisome; Carbon metabolism	Detoxification of Reactive Oxygen Species; Neutrophil degranulation
Q4KLH6-1	Centrosomal protein of 162 kDa [OS=Rattus norvegicus] ?			RGD1307365; Cep162	1	1	6	1	12.86	1
P01026	Complement C3 [OS=Rattus norvegicus]	0.324	1e-15	C3	2	3	5	3	13.39	1	Herpes simplex infection; Viral carcinogenesis; Chagas disease (American trypanosomiasis); Systemic lupus erythematosus; Legionellosis; Pertussis; Tuberculosis; Staphylococcus aureus infection; Leishmaniasis; Complement and coagulation cascades; Phagosome
P16232	Corticosteroid 11-beta-dehydrogenase isozyme 1 [OS=Rattus norvegicus]	0.14	1e-15	Hsd11b1	5	1	2	1	5.4	1	Chemical carcinogenesis; Metabolic pathways; Metabolism of xenobiotics by cytochrome P450; Steroid hormone biosynthesis
P00173	Cytochrome b5 [OS=Rattus norvegicus]	0.316	1e-15	Cyb5a	22	2	6	2	21.06	1		Vitamin C (ascorbate) metabolism
P04799	Cytochrome P450 1A2 [OS=Rattus norvegicus]	1.316	0.000313082	Cyp1a2	8	3	7	3	16.11	1	Chemical carcinogenesis; Caffeine metabolism; Tryptophan metabolism; Metabolic pathways; Metabolism of xenobiotics by cytochrome P450; Retinol metabolism; Steroid hormone biosynthesis; Drug metabolism - cytochrome P450; Linoleic acid metabolism	Methylation; Synthesis of (16-20)-hydroxyeicosatetraenoic acids (HETE); Aromatic amines can be N-hydroxylated or N-dealkylated by CYP1A2; Aflatoxin activation and detoxification; Synthesis of epoxy (EET) and dihydroxyeicosatrienoic acids (DHET)
P11711	Cytochrome P450 2A1 [OS=Rattus norvegicus]	0.463	0.000521895	Cyp2a1	24	10	40	4	109.42	1	Metabolic pathways; Retinol metabolism	Xenobiotics; Aflatoxin activation and detoxification
P15149	Cytochrome P450 2A2 [OS=Rattus norvegicus]	0.687	0.0998503	Cyp2a2	17	7	33	1	90.75	1	Metabolic pathways; Retinol metabolism
P00176	Cytochrome P450 2B1 [OS=Rattus norvegicus]	0.307	1.23526e-11	Cyp2b1	28	12	124	2	340.83	1
P04167-1	Cytochrome P450 2B2 [OS=Rattus norvegicus]	0.345	1.61552e-07	Cyp2b2	16	6	17	4	44.94	1	Arachidonic acid metabolism; Chemical carcinogenesis; Metabolic pathways; Retinol metabolism; Steroid hormone biosynthesis
P13107	Cytochrome P450 2B3 [OS=Rattus norvegicus] ?			Cyp2b3	4	2	8	1	19.31	1
P08683	cytochrome P450 2C11 [OS=Rattus norvegicus]	0.417	3.71499e-06	Cyp2c11	12	4	9	4	26.6	1	Arachidonic acid metabolism; Chemical carcinogenesis; Metabolic pathways; Retinol metabolism; Steroid hormone biosynthesis; Linoleic acid metabolism; Inflammatory mediator regulation of TRP channels; Serotonergic synapse
P24470	Cytochrome P450 2C23 [OS=Rattus norvegicus]	0.328	1.40969e-10	Cyp2c23	3	1	5	1	13.28	1
P33273	Cytochrome P450 2C55 [OS=Rattus norvegicus]	0.411	0.0973738	Cyp2c80	18	8	49	6	123.64	1
P05178	Cytochrome P450 2C6 [OS=Rattus norvegicus]	0.742	0.018305	Cyp2c6v1; Cyp2c6	3	1	1	1	3.07	1
P05179	Cytochrome P450 2C7 [OS=Rattus norvegicus]	0.951	0.999903	Cyp2c7	2	1	2	1	4.6	1	Arachidonic acid metabolism; Chemical carcinogenesis; Metabolic pathways; Retinol metabolism; Steroid hormone biosynthesis; Linoleic acid metabolism; Inflammatory mediator regulation of TRP channels; Serotonergic synapse
P19225	Cytochrome P450 2C70 [OS=Rattus norvegicus]	0.445	0.00114749	Cyp2c22	12	5	13	3	38.24	1	Arachidonic acid metabolism; Chemical carcinogenesis; Metabolic pathways; Retinol metabolism; Steroid hormone biosynthesis; Linoleic acid metabolism; Inflammatory mediator regulation of TRP channels; Serotonergic synapse
P10633	cytochrome P450 2D1 [OS=Rattus norvegicus]	1.654	0.000345804	Cyp2d1	20	8	30	6	92.09	1	Steroid hormone biosynthesis; Serotonergic synapse
P10634	Cytochrome P450 2D26 [OS=Rattus norvegicus]	1.387	0.00722814	Cyp2d2	8	3	11	1	28.88	1	Steroid hormone biosynthesis; Serotonergic synapse	Xenobiotics
P12938	Cytochrome P450 2D3 [OS=Rattus norvegicus]	2.34	0.00426187	Cyp2d3	7	3	5	3	12.72	1	Steroid hormone biosynthesis; Serotonergic synapse	Xenobiotics
P05182	Cytochrome P450 2E1 [OS=Rattus norvegicus]	0.178	1e-15	Cyp2e1	47	21	215	14	550.64	1	Arachidonic acid metabolism; Chemical carcinogenesis; Metabolic pathways; Metabolism of xenobiotics by cytochrome P450; Steroid hormone biosynthesis; Drug metabolism - cytochrome P450; Linoleic acid metabolism; Non-alcoholic fatty liver disease (NAFLD)	CYP2E1 reactions
P04800	Cytochrome P450 3A1 [OS=Rattus norvegicus]	0.367	2.25214e-06	Cyp3a23/3a1	5	2	12	1	35.88	1
Q64581	Cytochrome P450 3A18 [OS=Rattus norvegicus]	0.426	0.0173739	Cyp3a18	27	13	227	6	607.83	1	Chemical carcinogenesis; Metabolic pathways; Retinol metabolism; Steroid hormone biosynthesis; Linoleic acid metabolism
P05183	Cytochrome P450 3A2 [OS=Rattus norvegicus]	0.228	1e-15	Cyp3a2	5	3	31	1	64.56	1	Chemical carcinogenesis; Metabolic pathways; Retinol metabolism; Steroid hormone biosynthesis; Linoleic acid metabolism
P51538	Cytochrome P450 3A9 [OS=Rattus norvegicus]	0.672	0.706631	Cyp3a9	2	1	1	1	2.04	1
P36365	Dimethylaniline monooxygenase [N-oxide-forming] 1 [OS=Rattus norvegicus]	0.233	1e-15	Fmo1	4	2	4	2	10.33	1	Drug metabolism - cytochrome P450	FMO oxidises nucleophiles
Q9EQ76	Dimethylaniline monooxygenase [N-oxide-forming] 3 [OS=Rattus norvegicus]	0.291	1e-15	Fmo3	3	1	1	1	3.46	1	Drug metabolism - cytochrome P450
Q8K4C0	Dimethylaniline monooxygenase [N-oxide-forming] 5 [OS=Rattus norvegicus]	0.382	1e-15	Fmo5	2	1	2	1	4.99	1	Drug metabolism - cytochrome P450
Q641Y0	Dolichyl-diphosphooligosaccharide--protein glycosyltransferase 48 kDa subunit [OS=Rattus norvegicus]	9.029	1e-15	Ddost	4	2	4	2	9.97	1	Protein processing in endoplasmic reticulum; Metabolic pathways; N-Glycan biosynthesis	Neutrophil degranulation
P07153	Dolichyl-diphosphooligosaccharide--protein glycosyltransferase subunit 1 [OS=Rattus norvegicus]	16.81	1e-15	Rpn1	6	2	3	2	12.56	1
P62630	Elongation factor 1-alpha 1 [OS=Rattus norvegicus]	0.859	0.800386	Eef1a1	2	1	2	1	5.89	1	Legionellosis; RNA transport
Q66HD0-1	Endoplasmin [OS=Rattus norvegicus]	0.11	1e-15	Hsp90b1	3	2	4	2	12.6	1	Prostate cancer; Estrogen signaling pathway; Protein processing in endoplasmic reticulum; PI3K-Akt signaling pathway; Pathways in cancer; Thyroid hormone synthesis
P07687	epoxide hydrolase 1 [OS=Rattus norvegicus]	0.139	1e-15	Ephx1	6	2	2	2	5.29	1	Chemical carcinogenesis; Metabolism of xenobiotics by cytochrome P450; Bile secretion	Phase I - Functionalization of compounds
Q62730	Estradiol 17-beta-dehydrogenase 2 [OS=Rattus norvegicus]	0.558	5.62375e-06	Hsd17b2	4	1	1	1	2.79	1	Ovarian steroidogenesis; Metabolic pathways; Steroid hormone biosynthesis
P68101	Eukaryotic translation initiation factor 2 subunit 1 [OS=Rattus norvegicus]	0.892	0.99855	Eif2s1	5	1	1	1	2.12	1	Herpes simplex infection; Apoptosis; Measles; Influenza A; Hepatitis C; Protein processing in endoplasmic reticulum; RNA transport; Non-alcoholic fatty liver disease (NAFLD)	ABC-family proteins mediated transport; Translation initiation complex formation; Recycling of eIF2:GDP; PERK regulates gene expression; GTP hydrolysis and joining of the 60S ribosomal subunit; Formation of the ternary complex, and subsequently, the 43S complex; Ribosomal scanning and start codon recognition; L13a-mediated translational silencing of Ceruloplasmin expression
Q920R3	Fatty acid desaturase 1 [OS=Rattus norvegicus]	3.261	1.47331e-09	Fads1	2	1	1	1	2.51	1	Fatty acid metabolism; Biosynthesis of unsaturated fatty acids	Linoleic acid (LA) metabolism; alpha-linolenic acid (ALA) metabolism
P30839	Fatty aldehyde dehydrogenase [OS=Rattus norvegicus]	0.921	0.989017	Aldh3a2	2	1	1	1	2.02	1	Pentose and glucuronate interconversions; Lysine degradation; Arginine and proline metabolism; Histidine metabolism; Glycolysis / Gluconeogenesis; Fatty acid degradation; Tryptophan metabolism; Metabolic pathways; Valine, leucine and isoleucine degradation; Pyruvate metabolism; Glycerolipid metabolism; Ascorbate and aldarate metabolism; beta-Alanine metabolism
P97612	Fatty-acid amide hydrolase 1 [OS=Rattus norvegicus]	0.386	1.87563e-11	Faah; LOC100911581	9	3	4	3	10.78	1	Retrograde endocannabinoid signaling	Arachidonic acid metabolism
Q68FP1	Gelsolin [OS=Rattus norvegicus]	2.919	0.141901	Gsn	2	1	1	1	2.29	1	Viral carcinogenesis; Fc gamma R-mediated phagocytosis; Regulation of actin cytoskeleton	Caspase-mediated cleavage of cytoskeletal proteins; Neutrophil degranulation
P10860	Glutamate dehydrogenase 1, mitochondrial [OS=Rattus norvegicus]	0.37	1e-15	Glud1	2	1	2	1	5.23	1	Proximal tubule bicarbonate reclamation; D-Glutamine and D-glutamate metabolism; Metabolic pathways; Nitrogen metabolism; Arginine biosynthesis; Alanine, aspartate and glutamate metabolism; Carbon metabolism	Amino acid synthesis and interconversion (transamination); Transcriptional activation of mitochondrial biogenesis
P09811	Glycogen phosphorylase, liver form [OS=Rattus norvegicus]	2.377	1.05968e-05	Pygl	10	6	11	6	35.81	1	Starch and sucrose metabolism; Metabolic pathways; Insulin resistance; Glucagon signaling pathway; Insulin signaling pathway	Glycogen breakdown (glycogenolysis); Neutrophil degranulation
P06866-1	Haptoglobin [OS=Rattus norvegicus]	0.125	1e-15	Hp	3	1	2	1	4.49	1
P63018	Heat shock cognate 71 kDa protein [OS=Rattus norvegicus]	0.702	1e-15	Hspa8	9	5	10	4	34.07	1	MAPK signaling pathway; Antigen processing and presentation; Measles; Longevity regulating pathway - multiple species; Legionellosis; Epstein-Barr virus infection; Influenza A; Estrogen signaling pathway; Protein processing in endoplasmic reticulum; Toxoplasmosis; Spliceosome; Endocytosis
Q63617	Hypoxia up-regulated protein 1 [OS=Rattus norvegicus]	0.117	1e-15	Hyou1	1	1	1	1	2.46	1	Protein processing in endoplasmic reticulum
P20760	Ig gamma-2A chain C region [OS=Rattus norvegicus] ?			LOC679045	4	1	1	1	2.04	1
P20761	Ig gamma-2b chain C region [OS=Rattus norvegicus] ?			Igh-1a; Igh-6	5	1	1	1	3.27	1
P01805	Ig heavy chain V region IR2 [OS=Rattus norvegicus] ?			HVR01	5	1	2	1	4.07	1
P01836	Ig kappa chain C region, A allele [OS=Rattus norvegicus]	0.854	0.997085	LOC500183; Igkc	12	1	2	1	7.07	1
Q6IMF3	Keratin, type II cytoskeletal 1 [OS=Rattus norvegicus]	4.083	1e-15	Krt1	7	2	4	2	9.84	1
Q6P6Q2	keratin, type II cytoskeletal 5 [OS=Rattus norvegicus]	4.049	0.0808148	Krt5	7	4	33	4	92.39	1
Q4FZU2	Keratin, type II cytoskeletal 6A [OS=Rattus norvegicus]	2.426	0.0672937	LOC683313; LOC100365213	4	2	5	2	13.82	1
Q64654	lanosterol 14-alpha demethylase [OS=Rattus norvegicus]	0.176	1e-15	Cyp51	4	2	19	2	58.39	1	Metabolic pathways; Steroid biosynthesis	Endogenous sterols; Cholesterol biosynthesis
P18163	Long-chain-fatty-acid--CoA ligase 1 [OS=Rattus norvegicus]	0.129	1e-15	Acsl1	2	1	1	1	2.34	1	Fatty acid metabolism; Fatty acid degradation; Fatty acid biosynthesis; Metabolic pathways; PPAR signaling pathway; Peroxisome; Adipocytokine signaling pathway	Linoleic acid (LA) metabolism; alpha-linolenic acid (ALA) metabolism; Synthesis of very long-chain fatty acyl-CoAs
P02761	Major urinary protein [OS=Rattus norvegicus]	0.072	1e-15	LOC259246	2	1	2	1	6.57	1
Q5FVQ4	Malectin [OS=Rattus norvegicus]	16.051	2.05138e-05	Mlec	4	1	2	1	4.92	1		Neutrophil degranulation; N-glycan trimming in the ER and Calnexin/Calreticulin cycle
P70580	Membrane-associated progesterone receptor component 1 [OS=Rattus norvegicus]	2.106	1.97722e-09	Pgrmc1	4	1	2	1	4.81	1		Neutrophil degranulation
Q562C4	Methyltransferase-like protein 7B [OS=Rattus norvegicus]	0.266	1e-15	Mettl7b	21	2	5	2	19.89	1
P08011	Microsomal glutathione S-transferase 1 [OS=Rattus norvegicus]	12.619	1e-15	Mgst1	4	1	2	1	4.51	1	Platinum drug resistance; Chemical carcinogenesis; Metabolism of xenobiotics by cytochrome P450; Glutathione metabolism; Drug metabolism - cytochrome P450	Glutathione conjugation; Aflatoxin activation and detoxification; Neutrophil degranulation
P53987	Monocarboxylate transporter 1 [OS=Rattus norvegicus]	6.283	0.000734196	Slc16a1	21	2	13	2	34.66	1		Basigin interactions; Pyruvate metabolism; Proton-coupled monocarboxylate transport
Q6IE52	Murinoglobulin-2 [OS=Rattus norvegicus]	0.267	4.21031e-08	Mug2	8	1	2	1	5.2	1
P20070	NADH-cytochrome b5 reductase 3 [OS=Rattus norvegicus]	0.093	1e-15	Cyb5r3	4	1	3	1	7.37	1	Amino sugar and nucleotide sugar metabolism	Phase I - Functionalization of compounds; Vitamin C (ascorbate) metabolism; Neutrophil degranulation
Q5XIA1	Nicalin [OS=Rattus norvegicus]	3.231	0.000361108	Ncln	1	1	1	1	2.49	1
Q6QI25	ORM1-like protein 3 [OS=Rattus norvegicus]	0.518	0.0561296	Ormdl3	4	1	2	1	4.52	1
P24368	peptidyl-prolyl cis-trans isomerase B [OS=Rattus norvegicus]	0.277	1e-15	Ppib	2	1	2	1	4.62	1		Collagen biosynthesis and modifying enzymes
Q63716	peroxiredoxin-1 [OS=Rattus norvegicus]	0.373	3.65898e-06	Prdx1	10	1	1	1	2.07	1	Peroxisome	TP53 Regulates Metabolic Genes; Detoxification of Reactive Oxygen Species
Q9Z0V5	Peroxiredoxin-4 [OS=Rattus norvegicus]	0.305	0.000862543	Prdx4	6	1	6	1	16.39	1		Neutrophil degranulation
P97562	Peroxisomal acyl-coenzyme A oxidase 2 [OS=Rattus norvegicus]	0.442	2.39134e-05	Acox2	8	1	2	1	4.47	1
P07896	Peroxisomal bifunctional enzyme [OS=Rattus norvegicus]	0.711	5.86064e-09	Ehhadh	4	1	2	1	4.74	1	Lysine degradation; Fatty acid metabolism; Fatty acid degradation; Butanoate metabolism; Tryptophan metabolism; Metabolic pathways; Valine, leucine and isoleucine degradation; Propanoate metabolism; PPAR signaling pathway; Peroxisome; beta-Alanine metabolism; Carbon metabolism	Beta-oxidation of very long chain fatty acids
P11598	Protein disulfide-isomerase A3 [OS=Rattus norvegicus]	0.137	1e-15	Pdia3	6	3	5	3	13.94	1	Antigen processing and presentation; Protein processing in endoplasmic reticulum
Q63081	Protein disulfide-isomerase A6 [OS=Rattus norvegicus]	0.128	1e-15	Pdia6	2	1	1	1	2.09	1	Protein processing in endoplasmic reticulum
Q6PEC3	Protein YIF1B [OS=Rattus norvegicus] ?			Yif1b	6	2	4	2	12.03	1
P50170	Retinol dehydrogenase 2 [OS=Rattus norvegicus]	2.289	0.133015	Rdh16	4	1	2	1	6.79	1	Metabolic pathways; Retinol metabolism
P55006	Retinol dehydrogenase 7 [OS=Rattus norvegicus]	1.744	0.0248519	Rdh7	10	3	6	1	19.04	1
Q7TP54	RHO family-interacting cell polarization regulator 2 [OS=Rattus norvegicus] ?			Fam65b; Ripor2	18	5	13	3	33.52	1
Q64578	Sarcoplasmic/endoplasmic reticulum calcium ATPase 1 [OS=Rattus norvegicus] ?			Atp2a1	2	1	1	1	2.68	1
P55159	Serum paraoxonase/arylesterase 1 [OS=Rattus norvegicus]	0.097	1e-15	Pon1	3	1	2	1	6.25	1	Metabolic pathways	Synthesis of 5-eicosatetraenoic acids
Q4FZX7	signal recognition particle receptor subunit beta [OS=Rattus norvegicus]	1.217	0.814345	Srprb	7	1	2	1	7.24	1	Protein export
Q66X93	staphylococcal nuclease domain-containing protein 1 [OS=Rattus norvegicus]	0.245	1e-15	Snd1	4	2	3	2	9.65	1	Viral carcinogenesis; Epstein-Barr virus infection
Q5PPL3	sterol-4-alpha-carboxylate 3-dehydrogenase, decarboxylating [OS=Rattus norvegicus]	0.174	1e-15	Nsdhl	11	3	15	3	36.57	1	Metabolic pathways; Steroid biosynthesis	Cholesterol biosynthesis
Q08013	Translocon-associated protein subunit gamma [OS=Rattus norvegicus]	16.024	1.53285e-11	Ssr3	8	1	1	1	2.47	1	Protein processing in endoplasmic reticulum
Q5I0E7	Transmembrane emp24 domain-containing protein 9 [OS=Rattus norvegicus]	16.245	1e-15	Tmed9	5	1	2	1	7.18	1		COPI-dependent Golgi-to-ER retrograde traffic; COPI-mediated anterograde transport
Q9Z142	Transmembrane protein 33 [OS=Rattus norvegicus]	4.131	0.00739826	Tmem33	9	2	6	2	17.54	1
P02767	Transthyretin [OS=Rattus norvegicus]	0.092	1e-15	Ttr	9	1	2	1	5.97	1	Thyroid hormone synthesis	Signaling by GPCR; Retinoid metabolism and transport; The canonical retinoid cycle in rods (twilight vision); Non-integrin membrane-ECM interactions; Neutrophil degranulation
Q6P9T8	Tubulin beta-4B chain [OS=Rattus norvegicus]	6.828	1e-15	Tubb4b	5	2	2	2	5	1	Gap junction; Phagosome
P62986	Ubiquitin-60S ribosomal protein L40 [OS=Rattus norvegicus] ?			Uba52	13	1	8	1	24.38	1
Q64550-1	UDP-glucuronosyltransferase 1-1 [OS=Rattus norvegicus]	1.751	0.00147162	Ugt1a1	7	3	6	2	16.42	1	Pentose and glucuronate interconversions; Porphyrin and chlorophyll metabolism; Drug metabolism - other enzymes; Chemical carcinogenesis; Metabolic pathways; Metabolism of xenobiotics by cytochrome P450; Retinol metabolism; Steroid hormone biosynthesis; Drug metabolism - cytochrome P450; Ascorbate and aldarate metabolism	Heme degradation; Glucuronidation
Q64633-1	UDP-glucuronosyltransferase 1-7 [OS=Rattus norvegicus]	1.239	0.245949	Ugt1a7c	4	2	5	1	14.39	1
P09875	UDP-glucuronosyltransferase 2B1 [OS=Rattus norvegicus]	0.763	0.388431	Ugt2b1	17	7	49	6	163.14	1	Pentose and glucuronate interconversions; Porphyrin and chlorophyll metabolism; Drug metabolism - other enzymes; Chemical carcinogenesis; Metabolic pathways; Metabolism of xenobiotics by cytochrome P450; Retinol metabolism; Steroid hormone biosynthesis; Drug metabolism - cytochrome P450; Ascorbate and aldarate metabolism
P36511	UDP-glucuronosyltransferase 2B15 [OS=Rattus norvegicus]	0.505	0.000497638	Ugt2b15; Ugt2b35	4	2	8	1	20.35	1
P08542	UDP-glucuronosyltransferase 2B17 [OS=Rattus norvegicus]	0.589	0.312897	Ugt2b17	12	6	21	1	61.2	1	Pentose and glucuronate interconversions; Porphyrin and chlorophyll metabolism; Drug metabolism - other enzymes; Chemical carcinogenesis; Metabolic pathways; Metabolism of xenobiotics by cytochrome P450; Retinol metabolism; Steroid hormone biosynthesis; Drug metabolism - cytochrome P450; Ascorbate and aldarate metabolism
P08541	UDP-glucuronosyltransferase 2B2 [OS=Rattus norvegicus]	0.574	7.83519e-05	Ugt2b	8	4	14	1	43.45	1
P19488	UDP-glucuronosyltransferase 2B37 [OS=Rattus norvegicus]	0.772	0.859561	Ugt2b37	13	6	20	2	61.75	1
P97524	very long-chain acyl-CoA synthetase [OS=Rattus norvegicus]	2.032	1.53514e-07	Slc27a2	2	1	1	1	1.95	1	Insulin resistance; PPAR signaling pathway; Peroxisome
Q6P7R8	Very-long-chain 3-oxoacyl-CoA reductase [OS=Rattus norvegicus]	2.013	0.000255331	Tecr	4	1	1	1	2.86	1	Fatty acid metabolism; Fatty acid elongation; Metabolic pathways; Biosynthesis of unsaturated fatty acids; Steroid hormone biosynthesis	Synthesis of very long-chain fatty acyl-CoAs
Q64232	Very-long-chain enoyl-CoA reductase [OS=Rattus norvegicus]	1.468	0.246408	Tecr	9	3	5	3	10.69	1	Fatty acid metabolism; Fatty acid elongation; Biosynthesis of unsaturated fatty acids	Synthesis of very long-chain fatty acyl-CoAs
Q4KM74	Vesicle-trafficking protein SEC22b [OS=Rattus norvegicus]	3.267	9e-05	Sec22b	15	2	4	2	10.65	1	Legionellosis; SNARE interactions in vesicular transport; Phagosome	ER-Phagosome pathway; COPI-dependent Golgi-to-ER retrograde traffic; Cargo concentration in the ER; COPII (Coat Protein 2) Mediated Vesicle Transport
Q9Z1A6	Vigilin [OS=Rattus norvegicus]	0.26	1e-15	Hdlbp	1	1	2	1	6.43	1
